# Supplementary material
Source: MDPI journal article supplement (https://www.mdpi.com/2306-5338/5/3/35)
Supplement: s1 [file s1]

Selection of the “Water Quality” tab followed by “Historical Data” will open the “Site Selection Criteria” webpage where the site numbers (Cataldo = 12413500; Harrison = 12413860) can be entered and water-quality parameters selected for downloading/outputting in multiple data formats. Streamflow for the streamgage sites can be found from their individual site webpages on the same NWIS website.
